# Supplementary material for: Absorption-based algorithm for satellite estimating the particulate organic carbon concentration in the global surface ocean
Source: Frontiers journal article supplement (doi:10.3389/fmars.2022.1048893), 2023-01-20
Supplement: Data_Sheet_1.docx [file Data_Sheet_1.docx]

Supplementary Material

# Supplementary Figures and Tables

## Supplementary Tables

**Supplementary Table 1.** Count of all match-ups, algorithm formulation match-ups, and algorithm validation match-ups corresponding to the OC-CCI dominant water classes.

| OC-CCI water class | 1 | 2 | 3 | 4 | 5 | 6 | 7 | 8 | 9 | 10 | 11 | 12 | 13 | 14 |
| --- | --- | --- | --- | --- | --- | --- | --- | --- | --- | --- | --- | --- | --- | --- |
| All match-ups | 18 | 173 | 317 | 552 | 94 | 123 | 21 | 158 | 322 | 79 | 617 | 646 | 398 | 62 |
| Algorithm Formulation | 11 | 115 | 213 | 370 | 59 | 78 | 14 | 112 | 219 | 52 | 416 | 417 | 270 | 41 |
| Algorithm validation | 7 | 58 | 104 | 182 | 35 | 45 | 7 | 46 | 103 | 27 | 201 | 229 | 128 | 21 |

## Supplementary Figures





**Supplementary Figure 1.** Distribution of dominant water class from the monthly average OC-CCI data in March 2020.
